# Supplementary material
Source: MDPI journal article supplement (https://www.mdpi.com/2073-4344/12/4/441)
Supplement: s1 [file s1]

## Supplementary Information

# Expanding the Range: AuCu Metal Aerogels from H<sub>2</sub>O and EtOH

Maximilian Georgi <sup>1</sup>, Johannes Kresse <sup>1</sup>, Karl Hiekel <sup>1</sup>, René Hübner <sup>2</sup> and Alexander Eychmüller <sup>1,\*</sup>

<sup>1</sup> Physical Chemistry, TU Dresden, 01069 Dresden, Germany; maximilian.georgi@tu-dresden.de (M.G.); johannes.kresse@tu-dresden.de (J.K.); karl.hiekel@tu-dresden.de (K.H.)

<sup>2</sup> Institute of Ion Beam Physics and Materials Research, Helmholtz-Zentrum Dresden-Rossendorf e.V., 01328 Dresden, Germany; r.huebner@hzdr.de

\* Correspondence: alexander.eychmueller@tu-dresden.de

**Table S1.** Properties of all Au<sub>x</sub>Cu<sub>y</sub> aerogels prepared via a synthesis in H<sub>2</sub>O and EtOH. Element compositions were determined via SEM-EDX, the average web thicknesses were determined from individual measurements of the TEM images and SSA/TpV via N<sub>2</sub> physisorption.

| Solvent          | Sample               | Element composition [at%] |      |                    | Web Thickness [nm] | SSA [m <sup>2</sup> g <sup>-1</sup> ] | TpV [cm <sup>3</sup> g <sup>-1</sup> ] |
|------------------|----------------------|---------------------------|------|--------------------|--------------------|---------------------------------------|----------------------------------------|
|                  |                      | Au                        | Cu   | Standard Deviation |                    |                                       |                                        |
| H <sub>2</sub> O | Au <sub>3</sub> Cu   | 73.4                      | 26.6 | 0.7                | 3.2 ± 0.8          | 56                                    | 0.121                                  |
|                  | AuCu                 | 49.9                      | 50.1 | 1.9                | 2.8 ± 0.6          | 59                                    | 0.140                                  |
|                  | AuCu <sub>3</sub>    | 24.9                      | 75.1 | 1.6                | 2.5 ± 0.7          | 59                                    | 0.213                                  |
|                  | AuCu AW              | 62.0                      | 38.0 | 2.5                | 2.9 ± 0.7          | 71                                    | 0.186                                  |
|                  | AuCu <sub>3</sub> AW | 62.2                      | 37.8 | 2.5                | 2.7 ± 0.7          | 69                                    | 0.226                                  |
| EtOH             | Au <sub>3</sub> Cu   | 76.0                      | 24.0 | 1.0                | 6.7 ± 1.3          | 28                                    | 0.122                                  |
|                  | AuCu                 | 52.0                      | 48.0 | 0.8                | 7.1 ± 1.5          | 40                                    | 0.294                                  |
|                  | AuCu <sub>3</sub>    | 26.9                      | 73.2 | 0.3                | 7.0 ± 1.5          | 64                                    | 0.490                                  |
|                  | Cu                   | -                         | -    | -                  | 6.6 ± 1.6          | 43                                    | 0.101                                  |

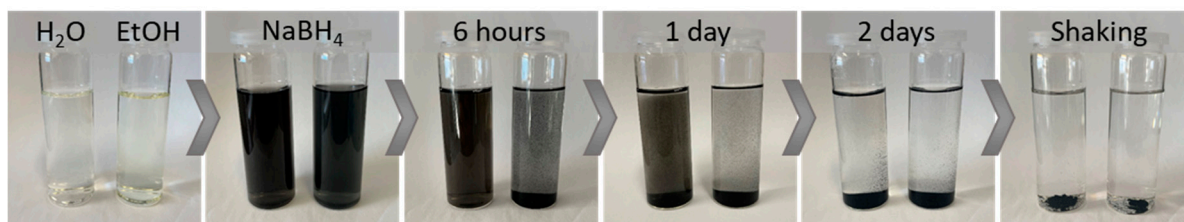

**Figure S1.** Time lapse photographs of the Au<sub>3</sub>Cu solvogel gelation process in water (left) and ethanol (right). The metal salt solutions turn dark upon NaBH<sub>4</sub> addition. The intermediately formed aggregates settle at different rates and form gels.

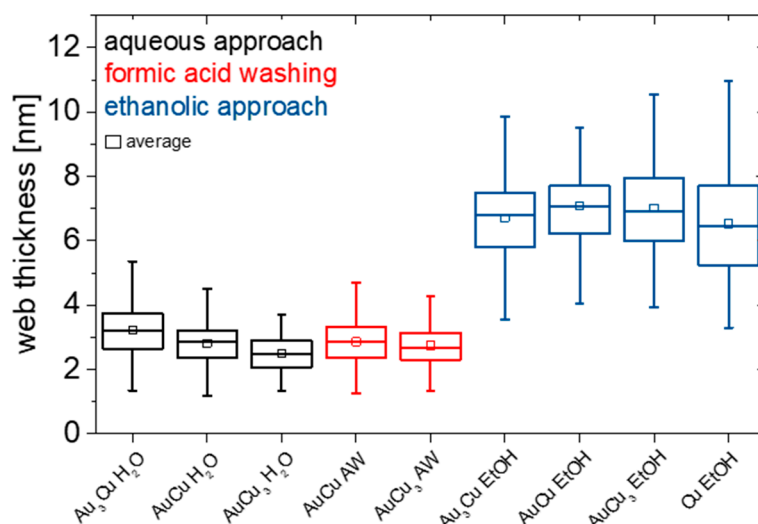

**Figure S2.** Overview of the web thicknesses and their size distribution of all prepared  $\text{Au}_3\text{Cu}_y$  aerogels, determined from bright-field TEM images and visualized in form of boxplots. The average web thickness of the gels prepared in aqueous solution is 3 nm, while that of the gels obtained in ethanolic solution is about 6 nm. In EtOH, the web thickness' size distribution becomes broader.

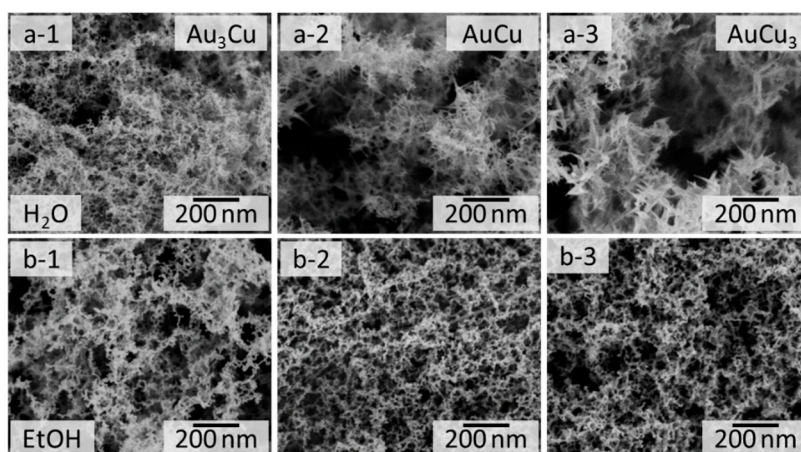

**Figure S3.** SEM images of  $\text{Au}_3\text{Cu}$  (1),  $\text{AuCu}$  (2), and  $\text{AuCu}_3$  (3) aerogels from an aqueous (a) and ethanolic (b) synthesis. The aerogels form three-dimensional, porous networks. In a-2 and a-3 the gels are covered with a needle-like substructure.

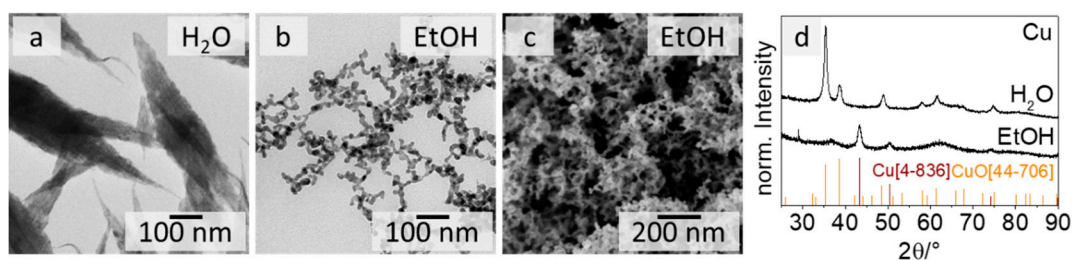

**Figure S4.** TEM (a + b) and SEM (c) images as well as XRD analysis (d) of reduced  $\text{CuCl}_2$ , following the synthesis parameter of the Au-Cu gels. In water (a) the reaction leads to the formation of CuO-needles (d). In EtOH the formation of a three-dimensional Cu aerogel (b + c) can be observed. The gel keeps its metallic character and an additional CuO phase (d).

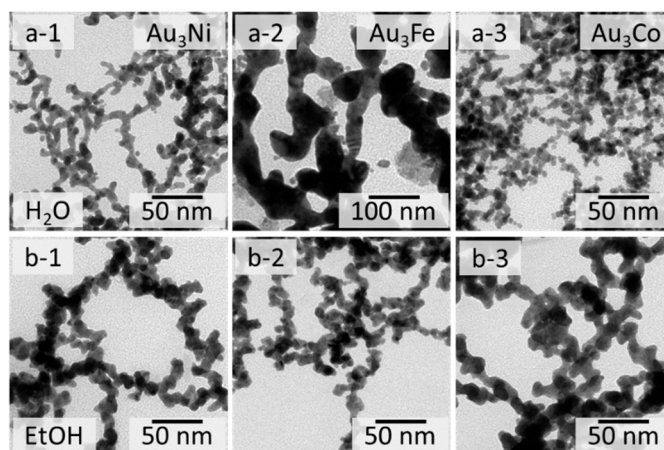

**Figure S5.** TEM images of  $\text{Au}_3\text{Ni}$  (1),  $\text{Au}_3\text{Fe}$  (2) and  $\text{Au}_3\text{Co}$  (3) gels, synthesized in  $\text{H}_2\text{O}$  (a) and  $\text{EtOH}$  (b). The synthesis results in irregular gel structures in water, while similar gel morphologies are obtained in ethanol.

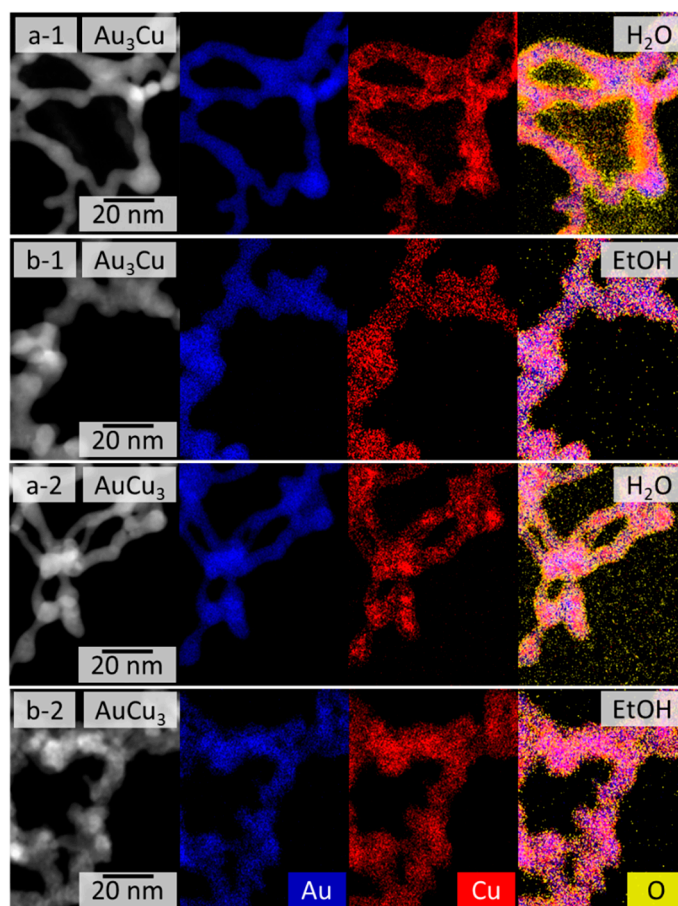

**Figure S6.** HAADF-STEM images (left) and EDX-based element distributions of the  $\text{Au}_3\text{Cu}$  (1) and  $\text{AuCu}_3$  (2) gels synthesized in water (a) and ethanol (b). The gels demonstrate a quite homogeneous distribution of Au and Cu over the whole gel networks.

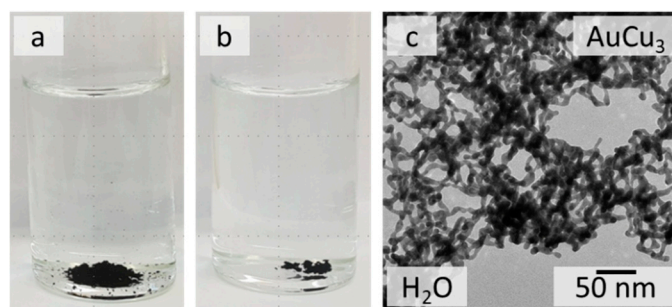

**Figure S7.** AuCu<sub>3</sub> gel before (a) and after (b) the acid treatment in a 88.5 mM formic acid solution. TEM image (c) of the acid-treated gel. The treatment leads to a macroscopic shrinkage of the structure and an increase of the web thickness.

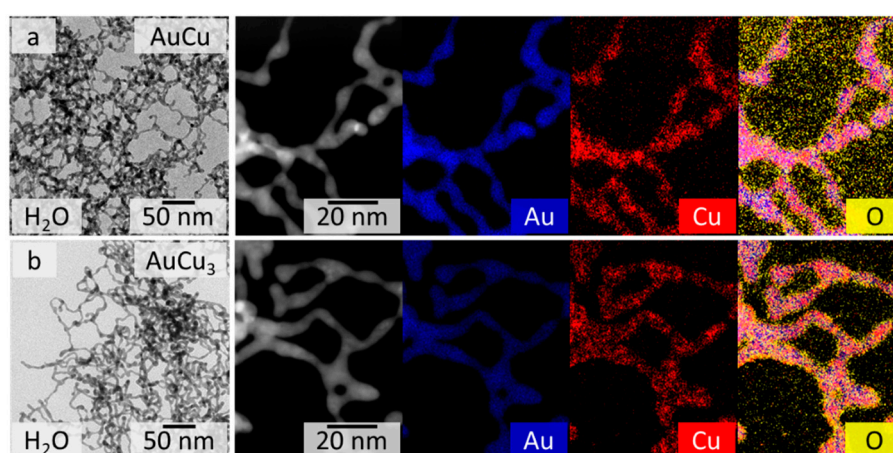

**Figure S8.** TEM micrographs as well as HAADF-STEM images and EDX-based element distributions of the AuCu (a) and AuCu<sub>3</sub> (b) gels from the aqueous approach after the acid treatment with HCOOH. CuO is not observable and the gel network remains untouched. Cu can still be found in the gel strands.

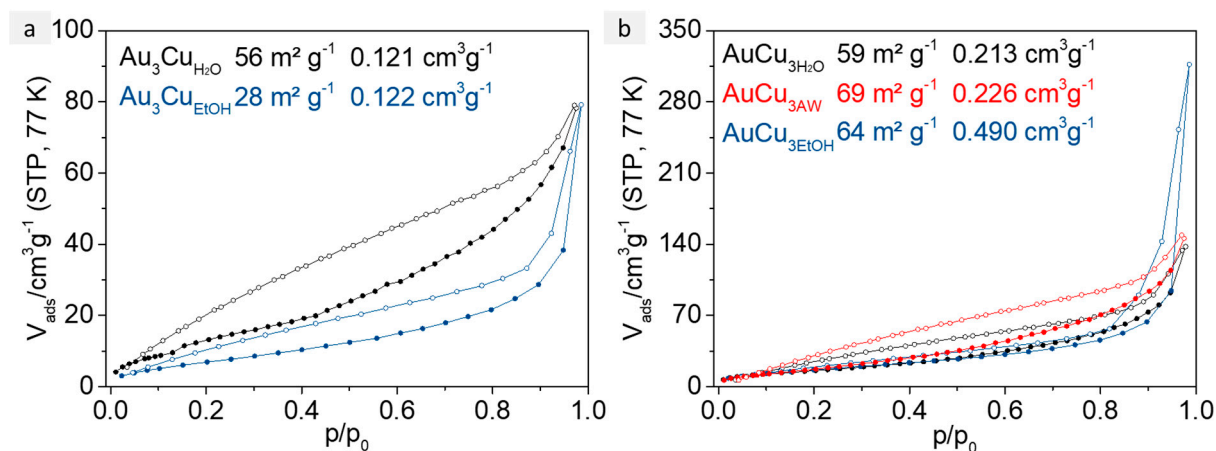

**Figure S9.** N<sub>2</sub> physisorption isotherms of Au<sub>3</sub>Cu (a) and AuCu<sub>3</sub> (b) aerogels synthesized in water (black), after acid treatment with HCOOH (red) and synthesized in EtOH (blue). All isotherms are combinations of type II and IV, indicating broad pore size distributions.
